# Supplementary material for: Temperature dependent structure and dynamics in smectite interlayers: 23Na MAS NMR spectroscopy of Na-hectorite
Source: Royal Society of Chemistry journal article supplement (doi:10.1039/c9ra01056d), 2019-01-01
Supplement: c9ra01056d1.pdf [file c9ra01056d1.pdf]

**Temperature dependent structure and dynamics in smectite interlayers:  $^{23}\text{Na}$  MAS NMR spectroscopy of Na-hectorite**

*Raju Nanda*<sup>1,2</sup>, *Geoffrey M. Bowers*<sup>3</sup>, *Narasimhan Loganathan*<sup>1</sup>, *Sarah D. Burton*<sup>4</sup>, *R. James Kirkpatrick*<sup>1,5</sup>

<sup>1</sup>Department of Chemistry, Michigan State University, East Lansing, MI, 48824, USA

<sup>2</sup>Present address: Department of Chemistry, Bar-Ilan University, Ramat Gan, Israel, 52900

<sup>3</sup>Department of Chemistry and Biochemistry, St. Mary's College of Maryland, St. Mary's City, MD, 20686, USA

<sup>4</sup>William R. Wiley Environmental and Molecular Sciences Laboratory, Pacific Northwest National Laboratory, Richland, WA, 99352, USA

<sup>5</sup>Department of Earth and Environmental Sciences, Michigan State University, East Lansing, MI, 48824, USA

**Supporting Information**

**Table S1.** Fitted peak maxima, full-widths at half-height (FWHH), and relative peak intensities of  $^{23}\text{Na}$  MAS NMR spectra of Na-hectorite collected at the indicated temperatures and relative humidities (R.H.s).

| <i>T</i> (°C) | $\delta$ (ppm) | FWHH (ppm) | Relative Intensity/% |
|---------------|----------------|------------|----------------------|
|               | <b>0% R.H.</b> |            |                      |
| 40            | -19.1          | 8.7        | 92.8                 |
|               | -28.7          | 5.4        | 7.2                  |
| -60           | -19.4          | 7.9        | 86.2                 |
|               | -29.0          | 6.6        | 13.8                 |
| -80           | -19.5          | 7.8        | 87.7                 |
|               | -29.2          | 6.7        | 12.3                 |
| -100          | -19.4          | 7.8        | 86.4                 |

|                 |       |      |      |
|-----------------|-------|------|------|
|                 | -29.3 | 6.9  | 13.6 |
| -120            | -19.3 | 8.2  | 85.8 |
|                 | -29.3 | 6.5  | 14.2 |
| <b>29% R.H.</b> |       |      |      |
| 40              | -6.4  | 4.0  | 64.6 |
|                 | -21.7 | 4.7  | 8.1  |
|                 | -26.8 | 13.5 | 27.4 |
| 0               | -6.1  | 4.9  | 63.2 |
|                 | -21.9 | 4.8  | 10.1 |
|                 | -27.5 | 12.2 | 26.7 |
| -20             | -5.9  | 5.6  | 71.6 |
|                 | -21.8 | 5.6  | 11.7 |
|                 | -28.3 | 12.6 | 16.7 |
| -40             | -5.9  | 6.6  | 61.8 |
|                 | -21.9 | 4.8  | 10.8 |
|                 | -27.4 | 12.6 | 27.5 |
| -60             | -5.2  | 8.3  | 72.7 |
|                 | -21.6 | 5.2  | 14.1 |
|                 | -28.1 | 10.8 | 13.2 |
| -80             | -0.1  | 4.1  | 30.8 |
|                 | -6.5  | 4.0  | 14.7 |
|                 | -11.4 | 6.5  | 15.5 |
|                 | -21.7 | 5.9  | 19.2 |
|                 | -28.4 | 12.0 | 19.9 |
| -100            | 1.1   | 7.5  | 38.0 |
|                 | -6.7  | 3.5  | 9.5  |
|                 | -11.7 | 7.5  | 16.7 |
|                 | -21.6 | 5.7  | 21.6 |
|                 | -28.3 | 9.7  | 14.2 |
| -120            | 1.1   | 7.6  | 26.2 |
|                 | -6.6  | 4.8  | 21.5 |
|                 | -11.9 | 8.2  | 9.8  |
|                 | -21.8 | 5.7  | 21.3 |
|                 | -27.2 | 12.9 | 21.3 |
| <b>43% R.H.</b> |       |      |      |
| 40              | -5.3  | 3.4  | 73.0 |
|                 | -19.4 | 6.7  | 27.4 |
| 20              | -5.5  | 4.0  | 65.8 |
|                 | -19.6 | 6.7  | 34.2 |
| 0               | -4.4  | 2.8  | 26.7 |
|                 | -6.5  | 3.7  | 45.3 |
|                 | -19.7 | 6.5  | 28.0 |
| -20             | -4.1  | 3.2  | 27.8 |
|                 | -6.7  | 4.2  | 44.0 |
|                 | -19.8 | 6.4  | 28.2 |
| -40             | -4.0  | 4.0  | 31.8 |

|                  |       |      |      |
|------------------|-------|------|------|
|                  | -7.0  | 5.5  | 40.2 |
|                  | -19.8 | 6.2  | 28.0 |
| -60              | -4.1  | 4.0  | 8.6  |
|                  | -6.3  | 9.9  | 53.0 |
|                  | -19.9 | 6.9  | 38.4 |
| -80              | -0.1  | 4.1  | 22.3 |
|                  | -5.8  | 5.2  | 22.2 |
|                  | -11.1 | 5.9  | 18.0 |
|                  | -20.0 | 7.2  | 37.1 |
| -100             | 0.6   | 5.8  | 25.5 |
|                  | -6.3  | 4.1  | 15.0 |
|                  | -11.6 | 6.8  | 22.6 |
|                  | -20.4 | 6.7  | 37.0 |
| -120             | 1.0   | 7.0  | 26.3 |
|                  | -6.3  | 5.5  | 17.3 |
|                  | -12.0 | 8.7  | 22.3 |
|                  | -20.6 | 6.1  | 33.2 |
|                  | -27.4 | 7.0  | 1.0  |
| <b>70% R.H.</b>  |       |      |      |
| 40               | -2.7  | 1.9  | 76.2 |
|                  | -21.1 | 6.2  | 23.8 |
| 20               | -2.2  | 2.0  | 83.9 |
|                  | -19.8 | 6.5  | 16.1 |
| 0                | -2.2  | 2.4  | 79.8 |
|                  | -19.4 | 5.5  | 20.2 |
| -20              | -2.0  | 2.9  | 74.2 |
|                  | -19.7 | 6.0  | 25.8 |
| -40              | -1.7  | 3.9  | 74.4 |
|                  | -21.1 | 6.2  | 25.6 |
| -60              | -1.2  | 3.8  | 36.2 |
|                  | -3.9  | 9.6  | 35.0 |
|                  | -20.0 | 6.0  | 28.9 |
| -80              | -0.2  | 2.7  | 42.5 |
|                  | -5.5  | 11.4 | 26.1 |
|                  | -20.0 | 6.4  | 31.4 |
| -100             | 0.4   | 5.0  | 45.2 |
|                  | -6.0  | 6.0  | 32.0 |
|                  | -20.1 | 5.2  | 22.8 |
| -120             | 1.1   | 6.6  | 50.8 |
|                  | -6.2  | 7.5  | 33.9 |
|                  | -20.0 | 5.3  | 15.3 |
| <b>100% R.H.</b> |       |      |      |
| 40               | -0.9  | 1.1  | 82.9 |
|                  | -20.1 | 6.0  | 17.2 |
| 20               | -0.4  | 1.1  | 83.6 |
|                  | -19.8 | 6.3  | 16.4 |

|      |       |     |      |
|------|-------|-----|------|
| -20  | 0.1   | 1.5 | 85.9 |
|      | -19.9 | 5.1 | 14.2 |
| -60  | 0.2   | 3.3 | 83.9 |
|      | -20.3 | 5.1 | 16.2 |
| -80  | 0.2   | 2.7 | 82.2 |
|      | -19.7 | 5.1 | 17.8 |
| -100 | 0.4   | 4.0 | 84.1 |
|      | -19.7 | 5.1 | 15.9 |
| -120 | 1.2   | 6.5 | 70.9 |
|      | -5.6  | 7.3 | 17.2 |
|      | -19.9 | 5.0 | 12.0 |

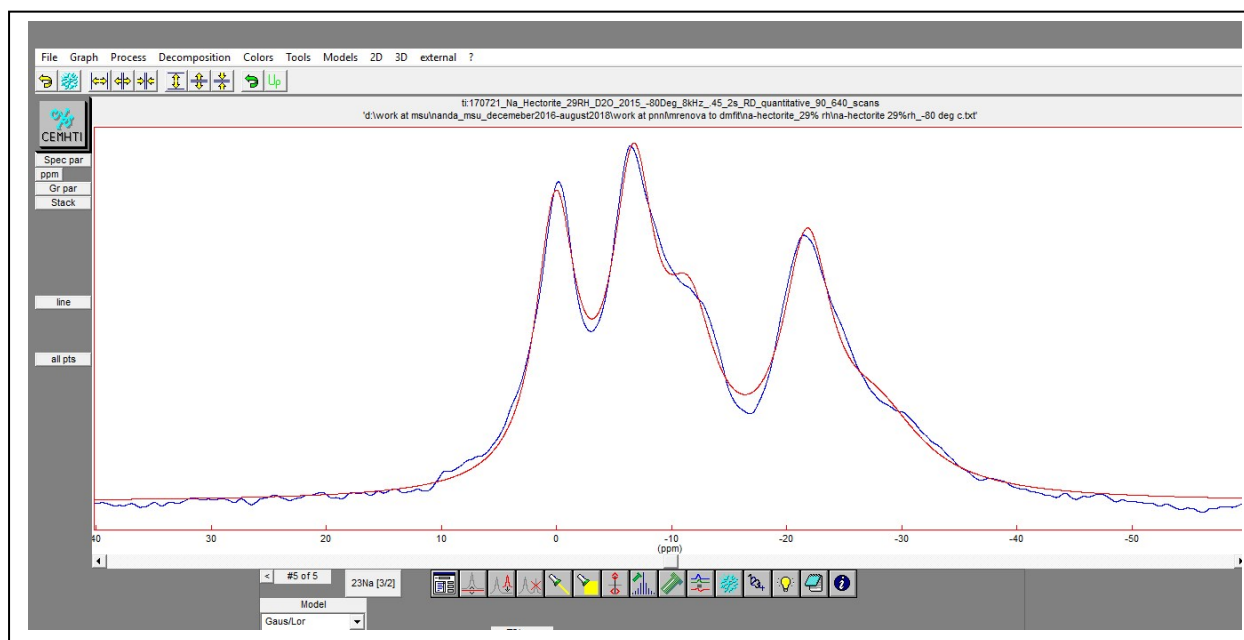

**Figure S1:** A representative example of the fitting of the  $^{23}\text{Na}$  MAS NMR spectra discussed in this paper using the DMfit. This spectrum is for Na-hectorite exposed to 29% R.H. at  $-80^{\circ}\text{C}$  and if fit with five Lorentzian components. The blue and red lines are the experimental and fitted spectra, respectively.
